# Supplementary material
Source: PubMed Central journal article supplement (PMC3318919)
Supplement: NIHMS365914-supplement-3.pdf [file NIHMS365914-supplement-3.pdf]

**Fig 6.** Surface marker expression of BMDCs seeded atop control or immunomodulatory (+TGF- $\beta$ 1 and IL-10) hydrogels, with (black bars) or without (white bars) immune stimulation. Hydrogels were seeded on control hydrogels (first column), or gels co-functionalized with either poly(L-lysine) (PLL, middle column) or hydrogels containing laminin and fibronectin (ECM, right column). The percentage shown represents the fraction of CD11c+ dendritic cells which stained positive for surface markers (MHCII, CD80, or CD86), as compared to isotype controls. Data is shown from 1 experiment but is representative of 3 replicate experiments.

**Fig 7.** Interferon  $\gamma$  (IFN- $\gamma$ ) production by T cells following culture with BMDCs. BMDCs were cultured on (A) TCPS or (B) PEG hydrogels functionalized with PLL. BMDCs were treated with or without (A) soluble TGF- $\beta$ 1 and IL-10 or (B) covalently immobilized TGF- $\beta$ 1 and IL-10 for two days. Then, + stim samples were treated with LPS overnight to induce DC maturation. Of note, T cells produced undetectable levels of IFN- $\gamma$  when cultured with unstimulated BMDCs. Data is shown from 1 experiment but is representative of 3 replicate experiments.

**Fig S1.** Metabolic activity of JAWSII dendritic cells after 48 hrs atop PEG hydrogels containing 0 to 100 nM PLL. Macromer concentrations of PLL >10 nM had a cytotoxic effect on cells, while concentrations  $\leq$ 10 nM did not affect cellular metabolic activity, as compared to control JAWSII cells seeded on blank PEG hydrogels. Metabolic activity was quantified via AlamarBlue Assay.

**Fig S2.** BMDCs on immunomodulatory hydrogels. Brightfield microscopy of BMDCs seeded atop PEG hydrogels that contain (top) no functionalization (middle) poly-L-lysine, and (bottom) the ECM proteins laminin and fibronectin. Scale = 60  $\mu$ m.
